# Supplementary material for: Testing the habituation assumption underlying models of parasitoid foraging behavior
Source: PeerJ. 2017 Mar 16;5:e3097. doi: 10.7717/peerj.3097 (PMC5357337; doi:10.7717/peerj.3097)
Supplement: Data S1 [file peerj-05-3097-s001.xlsx]

## Sheet: Training data
wasp_ID	train_int	train_N	res_time
week1_test 1a_15min	15min	1	4.1
week1_test 1b_15min	15min	1	3.91667
week1_test 2a_15min	15min	1	5.01667
week1_test 2b_15min	15min	1	6.33333
week1_test 3a_15min	15min	1	4.48333
week1_test 3b_15min	15min	1	5.46667
week1_test 4a_15min	15min	1	3.43333
week1_test 4b_15min	15min	1	4.81667
week1_test 5a_15min	15min	1	3.98333
week1_test 5b_15min	15min	1	6.01667
week1_test 1a_15min	15min	2	1.71667
week1_test 1b_15min	15min	2	1.35
week1_test 2a_15min	15min	2	0.833333
week1_test 2b_15min	15min	2	2.16667
week1_test 3a_15min	15min	2	0.866667
week1_test 3b_15min	15min	2	1.76667
week1_test 4a_15min	15min	2	0.916667
week1_test 4b_15min	15min	2	0.883333
week1_test 5a_15min	15min	2	1.65
week1_test 5b_15min	15min	2	2.01667
week1_test 1a_15min	15min	3	0.933333
week1_test 1b_15min	15min	3	0.733333
week1_test 2a_15min	15min	3	0.683333
week1_test 2b_15min	15min	3	0.65
week1_test 3a_15min	15min	3	0.5
week1_test 3b_15min	15min	3	1.01667
week1_test 4a_15min	15min	3	0.516667
week1_test 4b_15min	15min	3	1.01667
week1_test 5a_15min	15min	3	1.15
week1_test 5b_15min	15min	3	1.68333
week1_test 1a_15min	15min	4	0.5
week1_test 1b_15min	15min	4	0.466667
week1_test 2a_15min	15min	4	0.583333
week1_test 2b_15min	15min	4	0.416667
week1_test 3b_15min	15min	4	0.633333
week1_test 4b_15min	15min	4	0.3
week1_test 5a_15min	15min	4	0.8
week1_test 5b_15min	15min	4	0.716667
week2_test 1a_15min	15min	1	4.53333
week2_test 1b_15min	15min	1	5.3
week2_test 2a_15min	15min	1	3.73333
week2_test 2b_15min	15min	1	6.98333
week2_test 3a_15min	15min	1	5.18333
week2_test 3b_15min	15min	1	5.71667
week2_test 4a_15min	15min	1	4.6
week2_test 4b_15min	15min	1	5.38333
week2_test 5a_15min	15min	1	5.83333
week2_test 5b_15min	15min	1	5.26667
week2_test 1a_15min	15min	2	1.33333
week2_test 1b_15min	15min	2	1.46667
week2_test 2a_15min	15min	2	0.9
week2_test 2b_15min	15min	2	2.01667
week2_test 3a_15min	15min	2	1.11667
week2_test 3b_15min	15min	2	1.36667
week2_test 4a_15min	15min	2	0.9
week2_test 4b_15min	15min	2	0.866667
week2_test 5a_15min	15min	2	2.93333
week2_test 5b_15min	15min	2	1.55
week2_test 1a_15min	15min	3	0.8
week2_test 1b_15min	15min	3	0.9
week2_test 2a_15min	15min	3	0.716667
week2_test 3a_15min	15min	3	1.03333
week2_test 3b_15min	15min	3	0.95
week2_test 4a_15min	15min	3	0.683333
week2_test 5a_15min	15min	3	1.28333
week2_test 5b_15min	15min	3	1.33333
week2_test 1a_15min	15min	4	0.283333
week2_test 1b_15min	15min	4	0.466667
week2_test 2a_15min	15min	4	0.65
week2_test 3a_15min	15min	4	0.683333
week2_test 3b_15min	15min	4	0.666667
week2_test 5a_15min	15min	4	0.516667
week2_test 5b_15min	15min	4	0.666667
week3_test 1a_15min	15min	1	5.01667
week3_test 1b_15min	15min	1	5.45
week3_test 2a_15min	15min	1	4.3
week3_test 2b_15min	15min	1	3.58333
week3_test 3a_15min	15min	1	4.33333
week3_test 3b_15min	15min	1	5.88333
week3_test 4a_15min	15min	1	5.95
week3_test 4b_15min	15min	1	5.86667
week3_test 5a_15min	15min	1	6.18333
week3_test 5b_15min	15min	1	6.51667
week3_test 1a_15min	15min	2	1.3
week3_test 1b_15min	15min	2	1.33333
week3_test 2a_15min	15min	2	0.933333
week3_test 2b_15min	15min	2	0.85
week3_test 3a_15min	15min	2	1.25
week3_test 3b_15min	15min	2	1.51667
week3_test 4a_15min	15min	2	1.15
week3_test 4b_15min	15min	2	1.11667
week3_test 5a_15min	15min	2	2.05
week3_test 5b_15min	15min	2	1.65
week3_test 1a_15min	15min	3	0.95
week3_test 1b_15min	15min	3	1.03333
week3_test 2a_15min	15min	3	0.983333
week3_test 3a_15min	15min	3	1.08333
week3_test 3b_15min	15min	3	0.816667
week3_test 4a_15min	15min	3	0.683333
week3_test 4b_15min	15min	3	0.783333
week3_test 5a_15min	15min	3	1.1
week3_test 5b_15min	15min	3	0.683333
week3_test 1a_15min	15min	4	0.666667
week3_test 1b_15min	15min	4	0.766667
week3_test 2a_15min	15min	4	0.566667
week3_test 3a_15min	15min	4	0.866667
week3_test 3b_15min	15min	4	0.533333
week3_test 4a_15min	15min	4	0.883333
week3_test 4b_15min	15min	4	0.8
week3_test 5a_15min	15min	4	0.983333
week3_test 5b_15min	15min	4	0.516667
week4_test 1a_15min	15min	1	4.35
week4_test 1b_15min	15min	1	3.9
week4_test 2a_15min	15min	1	4.68333
week4_test 2b_15min	15min	1	5.03333
week4_test 3a_15min	15min	1	5.28333
week4_test 3b_15min	15min	1	5.53333
week4_test 4a_15min	15min	1	5.68333
week4_test 4b_15min	15min	1	6.05
week4_test 5a_15min	15min	1	3.5
week4_test 5b_15min	15min	1	3.03333
week4_test 1a_15min	15min	2	2.01667
week4_test 1b_15min	15min	2	1.1
week4_test 2a_15min	15min	2	1.5
week4_test 2b_15min	15min	2	1.7
week4_test 3a_15min	15min	2	2.05
week4_test 3b_15min	15min	2	2.15
week4_test 4a_15min	15min	2	1.4
week4_test 4b_15min	15min	2	2.53333
week4_test 5a_15min	15min	2	0.933333
week4_test 5b_15min	15min	2	0.983333
week4_test 1a_15min	15min	3	0.833333
week4_test 1b_15min	15min	3	0.883333
week4_test 2a_15min	15min	3	1.2
week4_test 2b_15min	15min	3	1.05
week4_test 3a_15min	15min	3	1
week4_test 3b_15min	15min	3	0.816667
week4_test 4a_15min	15min	3	0.7
week4_test 4b_15min	15min	3	1.51667
week4_test 5b_15min	15min	3	0.516667
week4_test 1a_15min	15min	4	0.3
week4_test 1b_15min	15min	4	0.583333
week4_test 2a_15min	15min	4	0.883333
week4_test 2b_15min	15min	4	0.683333
week4_test 3a_15min	15min	4	0.533333
week4_test 3b_15min	15min	4	0.316667
week4_test 4a_15min	15min	4	0.366667
week4_test 4b_15min	15min	4	0.75
week1_test 1a_30min	30min	1	3.93333
week1_test 1b_30min	30min	1	6.13333
week1_test 2a_30min	30min	1	5.58333
week1_test 2b_30min	30min	1	4.56667
week1_test 3a_30min	30min	1	5.95
week1_test 3b_30min	30min	1	3.7
week1_test 4a_30min	30min	1	5.01667
week1_test 4b_30min	30min	1	5.41667
week1_test 5a_30min	30min	1	5.31667
week1_test 5b_30min	30min	1	4.51667
week1_test 1a_30min	30min	2	1.65
week1_test 1b_30min	30min	2	1.56667
week1_test 2a_30min	30min	2	1.36667
week1_test 2b_30min	30min	2	2.88333
week1_test 3a_30min	30min	2	1.76667
week1_test 3b_30min	30min	2	0.85
week1_test 4b_30min	30min	2	2.3
week1_test 5a_30min	30min	2	2.51667
week1_test 5b_30min	30min	2	1.38333
week1_test 1a_30min	30min	3	1.16667
week1_test 1b_30min	30min	3	1.13333
week1_test 2a_30min	30min	3	1.03333
week1_test 2b_30min	30min	3	1.8
week1_test 3a_30min	30min	3	1.1
week1_test 3b_30min	30min	3	1.01667
week1_test 4b_30min	30min	3	1.28333
week1_test 5a_30min	30min	3	0.95
week1_test 5b_30min	30min	3	1.2
week1_test 1a_30min	30min	4	1.01667
week1_test 1b_30min	30min	4	0.866667
week1_test 2a_30min	30min	4	0.566667
week1_test 2b_30min	30min	4	1.68333
week1_test 3a_30min	30min	4	0.883333
week1_test 3b_30min	30min	4	0.983333
week1_test 4b_30min	30min	4	1.16667
week1_test 5a_30min	30min	4	0.766667
week1_test 5b_30min	30min	4	0.916667
week2_test 1a_30min	30min	1	4.81667
week2_test 1b_30min	30min	1	3.01667
week2_test 2a_30min	30min	1	5.26667
week2_test 2b_30min	30min	1	4.7
week2_test 3a_30min	30min	1	5.53333
week2_test 3b_30min	30min	1	6.25
week2_test 4a_30min	30min	1	5.51667
week2_test 4b_30min	30min	1	5.7
week2_test 5a_30min	30min	1	6.61667
week2_test 5b_30min	30min	1	4.75
week2_test 1a_30min	30min	2	2.1
week2_test 1b_30min	30min	2	2.01667
week2_test 2a_30min	30min	2	1.93333
week2_test 2b_30min	30min	2	1.71667
week2_test 3a_30min	30min	2	2.2
week2_test 3b_30min	30min	2	2.18333
week2_test 4a_30min	30min	2	2.06667
week2_test 4b_30min	30min	2	1.16667
week2_test 5a_30min	30min	2	1.75
week2_test 5b_30min	30min	2	1.7
week2_test 1a_30min	30min	3	1.03333
week2_test 1b_30min	30min	3	1.21667
week2_test 2a_30min	30min	3	1.83333
week2_test 2b_30min	30min	3	1.43333
week2_test 3a_30min	30min	3	1.23333
week2_test 3b_30min	30min	3	1.98333
week2_test 4a_30min	30min	3	1.11667
week2_test 4b_30min	30min	3	0.833333
week2_test 5a_30min	30min	3	1.43333
week2_test 5b_30min	30min	3	1.28333
week2_test 1a_30min	30min	4	0.816667
week2_test 2a_30min	30min	4	1.35
week2_test 3a_30min	30min	4	1.06667
week2_test 3b_30min	30min	4	0.966667
week2_test 4a_30min	30min	4	0.5
week2_test 4b_30min	30min	4	0.7
week2_test 5a_30min	30min	4	0.95
week2_test 5b_30min	30min	4	1.05
week3_test 1a_30min	30min	1	5.96667
week3_test 1b_30min	30min	1	4.78333
week3_test 2a_30min	30min	1	4.86667
week3_test 2b_30min	30min	1	5.01667
week3_test 3a_30min	30min	1	5.41667
week3_test 3b_30min	30min	1	5.93333
week3_test 4a_30min	30min	1	5.03333
week3_test 4b_30min	30min	1	4.5
week3_test 5a_30min	30min	1	4.76667
week3_test 5b_30min	30min	1	4.08333
week3_test 1a_30min	30min	2	2.25
week3_test 1b_30min	30min	2	1.65
week3_test 2a_30min	30min	2	1.71667
week3_test 2b_30min	30min	2	1.3
week3_test 3a_30min	30min	2	1.71667
week3_test 3b_30min	30min	2	2.5
week3_test 4a_30min	30min	2	1.4
week3_test 4b_30min	30min	2	2.01667
week3_test 5a_30min	30min	2	1.3
week3_test 5b_30min	30min	2	1.78333
week3_test 1a_30min	30min	3	1.28333
week3_test 1b_30min	30min	3	1.05
week3_test 2a_30min	30min	3	0.983333
week3_test 2b_30min	30min	3	1.38333
week3_test 3a_30min	30min	3	1.03333
week3_test 3b_30min	30min	3	1.33333
week3_test 4a_30min	30min	3	0.933333
week3_test 4b_30min	30min	3	1.53333
week3_test 5a_30min	30min	3	1.21667
week3_test 5b_30min	30min	3	1.06667
week3_test 1a_30min	30min	4	1
week3_test 1b_30min	30min	4	0.566667
week3_test 2a_30min	30min	4	0.683333
week3_test 2b_30min	30min	4	1.01667
week3_test 3a_30min	30min	4	0.966667
week3_test 3b_30min	30min	4	1
week3_test 4a_30min	30min	4	0.883333
week3_test 4b_30min	30min	4	0.95
week3_test 5a_30min	30min	4	1.18333
week3_test 5b_30min	30min	4	1.11667
week4_test 1a_30min	30min	1	5.21667
week4_test 1b_30min	30min	1	3.75
week4_test 2a_30min	30min	1	5.43333
week4_test 2b_30min	30min	1	5.9
week4_test 3a_30min	30min	1	5.05
week4_test 3b_30min	30min	1	4.3
week4_test 4a_30min	30min	1	3.03333
week4_test 4b_30min	30min	1	3.68333
week4_test 5a_30min	30min	1	4.35
week4_test 5b_30min	30min	1	5.35
week4_test 1a_30min	30min	2	1.68333
week4_test 1b_30min	30min	2	1.81667
week4_test 2a_30min	30min	2	3.5
week4_test 2b_30min	30min	2	1.01667
week4_test 3b_30min	30min	2	1.06667
week4_test 4a_30min	30min	2	2.03333
week4_test 4b_30min	30min	2	1.71667
week4_test 5a_30min	30min	2	1.5
week4_test 5b_30min	30min	2	1.81667
week4_test 1a_30min	30min	3	1.21667
week4_test 1b_30min	30min	3	1.5
week4_test 2a_30min	30min	3	0.983333
week4_test 2b_30min	30min	3	1.26667
week4_test 3b_30min	30min	3	0.983333
week4_test 4a_30min	30min	3	1.38333
week4_test 4b_30min	30min	3	0.866667
week4_test 5a_30min	30min	3	1.2
week4_test 5b_30min	30min	3	1.05
week4_test 1a_30min	30min	4	1
week4_test 1b_30min	30min	4	0.716667
week4_test 2a_30min	30min	4	0.533333
week4_test 2b_30min	30min	4	0.883333
week4_test 3b_30min	30min	4	0.3
week4_test 4a_30min	30min	4	1.03333
week4_test 4b_30min	30min	4	0.983333
week4_test 5a_30min	30min	4	1.11667
week4_test 5b_30min	30min	4	1.06667
week1_test 1a_60min	60min	1	3.93333
week1_test 1b_60min	60min	1	6.13333
week1_test 2a_60min	60min	1	5.58333
week1_test 2b_60min	60min	1	4.56667
week1_test 3a_60min	60min	1	5.95
week1_test 3b_60min	60min	1	3.7
week1_test 4a_60min	60min	1	6.3
week1_test 4b_60min	60min	1	5.2
week1_test 5a_60min	60min	1	5.28333
week1_test 5b_60min	60min	1	6.01667
week1_test 1a_60min	60min	2	1.65
week1_test 1b_60min	60min	2	1.56667
week1_test 2a_60min	60min	2	1.36667
week1_test 2b_60min	60min	2	2.88333
week1_test 3a_60min	60min	2	1.76667
week1_test 3b_60min	60min	2	0.85
week1_test 4a_60min	60min	2	2.18333
week1_test 4b_60min	60min	2	1.5
week1_test 5a_60min	60min	2	2.28333
week1_test 5b_60min	60min	2	2.86667
week1_test 1a_60min	60min	3	1.16667
week1_test 1b_60min	60min	3	1.13333
week1_test 2a_60min	60min	3	1.03333
week1_test 2b_60min	60min	3	1.8
week1_test 3a_60min	60min	3	1.1
week1_test 3b_60min	60min	3	1.01667
week1_test 4a_60min	60min	3	1.33333
week1_test 4b_60min	60min	3	1.2
week1_test 5a_60min	60min	3	1.65
week1_test 5b_60min	60min	3	1.71667
week1_test 1a_60min	60min	4	1.01667
week1_test 1b_60min	60min	4	0.866667
week1_test 2a_60min	60min	4	0.566667
week1_test 2b_60min	60min	4	1.68333
week1_test 3a_60min	60min	4	0.883333
week1_test 3b_60min	60min	4	0.983333
week1_test 4a_60min	60min	4	1.21667
week1_test 4b_60min	60min	4	0.9
week1_test 5a_60min	60min	4	1.53333
week1_test 5b_60min	60min	4	1.25
week2_test 1a_60min	60min	1	4.75
week2_test 1b_60min	60min	1	5.01667
week2_test 2a_60min	60min	1	4.93333
week2_test 2b_60min	60min	1	5.33333
week2_test 3a_60min	60min	1	6.03333
week2_test 3b_60min	60min	1	4.78333
week2_test 4a_60min	60min	1	5.53333
week2_test 4b_60min	60min	1	4.98333
week2_test 5a_60min	60min	1	5.53333
week2_test 5b_60min	60min	1	6.5
week2_test 1a_60min	60min	2	2.01667
week2_test 1b_60min	60min	2	2.23333
week2_test 2a_60min	60min	2	1.9
week2_test 2b_60min	60min	2	1.75
week2_test 3a_60min	60min	2	3.33333
week2_test 4a_60min	60min	2	2.68333
week2_test 4b_60min	60min	2	1.35
week2_test 5a_60min	60min	2	1.08333
week2_test 5b_60min	60min	2	2.73333
week2_test 1a_60min	60min	3	1.33333
week2_test 1b_60min	60min	3	2.21667
week2_test 2a_60min	60min	3	0.983333
week2_test 2b_60min	60min	3	1.01667
week2_test 3a_60min	60min	3	2.28333
week2_test 4a_60min	60min	3	1.35
week2_test 4b_60min	60min	3	0.983333
week2_test 5a_60min	60min	3	1.33333
week2_test 5b_60min	60min	3	1.86667
week2_test 1a_60min	60min	4	1
week2_test 1b_60min	60min	4	1.38333
week2_test 2a_60min	60min	4	0.85
week2_test 2b_60min	60min	4	1.55
week2_test 3a_60min	60min	4	0.833333
week2_test 4a_60min	60min	4	1.28333
week2_test 4b_60min	60min	4	0.7
week2_test 5a_60min	60min	4	0.983333
week2_test 5b_60min	60min	4	1.5
week3_test 1a_60min	60min	1	5.18333
week3_test 1b_60min	60min	1	5.28333
week3_test 2a_60min	60min	1	4.7
week3_test 2b_60min	60min	1	4.58333
week3_test 3a_60min	60min	1	5.01667
week3_test 3b_60min	60min	1	5.56667
week3_test 4a_60min	60min	1	4.2
week3_test 4b_60min	60min	1	4.33333
week3_test 5a_60min	60min	1	3.88333
week3_test 5b_60min	60min	1	6.25
week3_test 1a_60min	60min	2	2.16667
week3_test 1b_60min	60min	2	2.56667
week3_test 2a_60min	60min	2	1.86667
week3_test 2b_60min	60min	2	1.98333
week3_test 3a_60min	60min	2	2.01667
week3_test 3b_60min	60min	2	2.58333
week3_test 4a_60min	60min	2	1.68333
week3_test 4b_60min	60min	2	1.83333
week3_test 5a_60min	60min	2	0.933333
week3_test 5b_60min	60min	2	2.71667
week3_test 1a_60min	60min	3	1.45
week3_test 1b_60min	60min	3	1.3
week3_test 2a_60min	60min	3	0.983333
week3_test 2b_60min	60min	3	1.06667
week3_test 3a_60min	60min	3	2.03333
week3_test 3b_60min	60min	3	1.21667
week3_test 4a_60min	60min	3	0.966667
week3_test 4b_60min	60min	3	1.33333
week3_test 5b_60min	60min	3	1.15
week3_test 1a_60min	60min	4	1.2
week3_test 1b_60min	60min	4	1.01667
week3_test 2a_60min	60min	4	0.583333
week3_test 2b_60min	60min	4	0.833333
week3_test 3a_60min	60min	4	1.53333
week3_test 3b_60min	60min	4	1.3
week3_test 4a_60min	60min	4	1.03333
week3_test 4b_60min	60min	4	1.25
week3_test 5b_60min	60min	4	0.966667
week4_test 1a_60min	60min	1	5.2
week4_test 1b_60min	60min	1	4.7
week4_test 2a_60min	60min	1	4.95
week4_test 2b_60min	60min	1	5.3
week4_test 3a_60min	60min	1	6.11667
week4_test 3b_60min	60min	1	5.55
week4_test 4a_60min	60min	1	6.26667
week4_test 4b_60min	60min	1	3.81667
week4_test 5a_60min	60min	1	5.18333
week4_test 5b_60min	60min	1	5.71667
week4_test 1a_60min	60min	2	2.11667
week4_test 1b_60min	60min	2	1.63333
week4_test 2a_60min	60min	2	2.28333
week4_test 2b_60min	60min	2	1.98333
week4_test 3a_60min	60min	2	2.51667
week4_test 3b_60min	60min	2	1.98333
week4_test 4a_60min	60min	2	2.45
week4_test 4b_60min	60min	2	1.9
week4_test 5a_60min	60min	2	2.68333
week4_test 5b_60min	60min	2	1.71667
week4_test 1a_60min	60min	3	1.85
week4_test 1b_60min	60min	3	1.38333
week4_test 2a_60min	60min	3	1.03333
week4_test 2b_60min	60min	3	1.45
week4_test 3a_60min	60min	3	0.966667
week4_test 3b_60min	60min	3	1.33333
week4_test 4a_60min	60min	3	1.7
week4_test 4b_60min	60min	3	1.38333
week4_test 5a_60min	60min	3	1.11667
week4_test 5b_60min	60min	3	0.883333
week4_test 1a_60min	60min	4	0.9
week4_test 1b_60min	60min	4	1.01667
week4_test 2a_60min	60min	4	1.35
week4_test 2b_60min	60min	4	1.2
week4_test 3a_60min	60min	4	0.716667
week4_test 3b_60min	60min	4	1.25
week4_test 4a_60min	60min	4	1.71667
week4_test 4b_60min	60min	4	1.43333
week4_test 5a_60min	60min	4	1.03333
week4_test 5b_60min	60min	4	1.06667

## Sheet: Testing data
train_int	test_int	experience	res_time
15min	24h	trained	2.68333
15min	24h	trained	3.1
15min	24h	trained	1.75
15min	24h	trained	2.25
15min	24h	trained	2.51667
15min	24h	trained	1.05
15min	24h	trained	2.76667
15min	24h	trained	3.33333
15min	24h	trained	2.9
15min	24h	trained	2.2
15min	24h	trained	1.75
15min	24h	trained	3.01667
15min	24h	trained	1.53333
15min	24h	trained	1.65
15min	24h	trained	2.36667
15min	24h	trained	2.26667
15min	48h	trained	3.03333
15min	48h	trained	3.51667
15min	48h	trained	1.9
15min	48h	trained	2.7
15min	48h	trained	3.7
15min	48h	trained	2.11667
15min	48h	trained	3.26667
15min	48h	trained	2.68333
15min	48h	trained	3.98333
15min	48h	trained	2.71667
15min	48h	trained	3.85
15min	48h	trained	3.05
15min	48h	trained	2.93333
15min	48h	trained	3
15min	48h	trained	3.71667
15min	48h	trained	3.3
30min	24h	trained	1.53333
30min	24h	trained	2.25
30min	24h	trained	1.98333
30min	24h	trained	1.75
30min	24h	trained	2.3
30min	24h	trained	2.5
30min	24h	trained	1.4
30min	24h	trained	2.51667
30min	24h	trained	2.06667
30min	24h	trained	1.61667
30min	24h	trained	3.03333
30min	24h	trained	1.4
30min	24h	trained	2.61667
30min	24h	trained	2.31667
30min	24h	trained	2.05
30min	24h	trained	1.38333
30min	24h	trained	0.916667
30min	24h	trained	1.46667
30min	48h	trained	2.38333
30min	48h	trained	2.4
30min	48h	trained	1.28333
30min	48h	trained	2.83333
30min	48h	trained	2.98333
30min	48h	trained	2.01667
30min	48h	trained	1.63333
30min	48h	trained	3.01667
30min	48h	trained	2.66667
30min	48h	trained	3.08333
30min	48h	trained	2.53333
30min	48h	trained	1.75
30min	48h	trained	2.61667
30min	48h	trained	2.43333
30min	48h	trained	1.75
30min	48h	trained	2.85
30min	48h	trained	2.1
30min	48h	trained	2.56667
60min	24h	trained	2.01667
60min	24h	trained	2.3
60min	24h	trained	1.71667
60min	24h	trained	1.96667
60min	24h	trained	2.61667
60min	24h	trained	1.98333
60min	24h	trained	2.35
60min	24h	trained	1.56667
60min	24h	trained	2.3
60min	24h	trained	1.45
60min	24h	trained	2.05
60min	24h	trained	0.85
60min	24h	trained	2.4
60min	24h	trained	2.2
60min	24h	trained	0.85
60min	24h	trained	2.46667
60min	24h	trained	2.71667
60min	24h	trained	2.05
60min	24h	trained	1.48333
60min	48h	trained	1.9
60min	48h	trained	2.01667
60min	48h	trained	3.51667
60min	48h	trained	2.45
60min	48h	trained	2.56667
60min	48h	trained	1.58333
60min	48h	trained	2.11667
60min	48h	trained	2.2
60min	48h	trained	2.81667
60min	48h	trained	2.46667
60min	48h	trained	2.35
60min	48h	trained	1.63333
60min	48h	trained	3.03333
60min	48h	trained	2.68333
60min	48h	trained	2.45
60min	48h	trained	1.38333
60min	48h	trained	1.7
60min	48h	trained	2.9
60min	48h	trained	2.51667
NA	24h	untrained	4.5
NA	24h	untrained	5.21667
NA	24h	untrained	5.78333
NA	24h	untrained	5.71667
NA	24h	untrained	5.16667
NA	24h	untrained	4.53333
NA	24h	untrained	6.21667
NA	24h	untrained	4.53333
NA	24h	untrained	5.6
NA	24h	untrained	4.68333
NA	24h	untrained	4.38333
NA	24h	untrained	5.95
NA	24h	untrained	5.53333
NA	24h	untrained	4.01667
NA	24h	untrained	6.78333
NA	24h	untrained	5.88333
NA	48h	untrained	5.03333
NA	48h	untrained	4.21667
NA	48h	untrained	4.2
NA	48h	untrained	4.68333
NA	48h	untrained	5.3
NA	48h	untrained	3.45
NA	48h	untrained	4.86667
NA	48h	untrained	5.26667
NA	48h	untrained	6.61667
NA	48h	untrained	5.8
NA	48h	untrained	5.31667
NA	48h	untrained	4.98333
NA	48h	untrained	4.78333
NA	48h	untrained	4.93333
NA	48h	untrained	6.53333
NA	48h	untrained	5.01667
NA	24h	untrained	4.81667
NA	24h	untrained	5.45
NA	24h	untrained	6.3
NA	24h	untrained	5.23333
NA	24h	untrained	5.05
NA	24h	untrained	5.01667
NA	24h	untrained	4.28333
NA	24h	untrained	3.56667
NA	24h	untrained	4.35
NA	24h	untrained	5.86667
NA	24h	untrained	5.13333
NA	24h	untrained	3.68333
NA	24h	untrained	4.36667
NA	24h	untrained	5.85
NA	24h	untrained	4.76667
NA	24h	untrained	4.08333
NA	24h	untrained	5.31667
NA	24h	untrained	5.78333
NA	48h	untrained	4.51667
NA	48h	untrained	6.3
NA	48h	untrained	4.53333
NA	48h	untrained	5.4
NA	48h	untrained	6.63333
NA	48h	untrained	4.38333
NA	48h	untrained	3.98333
NA	48h	untrained	5.01667
NA	48h	untrained	5.15
NA	48h	untrained	5.01667
NA	48h	untrained	4.75
NA	48h	untrained	5.35
NA	48h	untrained	5.38333
NA	48h	untrained	4.68333
NA	48h	untrained	5.95
NA	48h	untrained	4.28333
NA	48h	untrained	4.83333
NA	48h	untrained	5.71667
NA	24h	untrained	4.8
NA	24h	untrained	4.95
NA	24h	untrained	5.01667
NA	24h	untrained	6.1
NA	24h	untrained	4.7
NA	24h	untrained	4.51667
NA	24h	untrained	4.98333
NA	24h	untrained	5.88333
NA	24h	untrained	5.51667
NA	24h	untrained	5.3
NA	24h	untrained	4.8
NA	24h	untrained	6.01667
NA	24h	untrained	5.83333
NA	24h	untrained	5.71667
NA	24h	untrained	4.61667
NA	24h	untrained	5.3
NA	24h	untrained	5.53333
NA	24h	untrained	6.01667
NA	24h	untrained	5.91667
NA	48h	untrained	4.93333
NA	48h	untrained	5.38333
NA	48h	untrained	6.01667
NA	48h	untrained	4.71667
NA	48h	untrained	3.68333
NA	48h	untrained	4.21667
NA	48h	untrained	6.11667
NA	48h	untrained	5.2
NA	48h	untrained	4.86667
NA	48h	untrained	5.61667
NA	48h	untrained	5.68333
NA	48h	untrained	3.61667
NA	48h	untrained	4.7
NA	48h	untrained	5.03333
NA	48h	untrained	5.88333
NA	48h	untrained	6.3
NA	48h	untrained	5.31667
NA	48h	untrained	5.6
NA	48h	untrained	5.9

## Sheet: Final training sess vs testing
wasp_ID	train_int	test_int	stage	res_time
week1_test 1a_15min	15min	24h	testing	2.68333
week1_test 1a_15min	15min	24h	training	0.5
week1_test 1a_30min	30min	24h	testing	1.53333
week1_test 1a_30min	30min	24h	training	1.01667
week1_test 1a_60min	60min	24h	testing	2.01667
week1_test 1a_60min	60min	24h	training	1.01667
week1_test 1b_15min	15min	48h	testing	3.03333
week1_test 1b_15min	15min	48h	training	0.466667
week1_test 1b_30min	30min	48h	testing	2.38333
week1_test 1b_30min	30min	48h	training	0.866667
week1_test 1b_60min	60min	48h	testing	1.9
week1_test 1b_60min	60min	48h	training	0.866667
week1_test 2a_15min	15min	24h	testing	3.1
week1_test 2a_15min	15min	24h	training	0.583333
week1_test 2a_30min	30min	24h	testing	2.25
week1_test 2a_30min	30min	24h	training	0.566667
week1_test 2a_60min	60min	24h	testing	2.3
week1_test 2a_60min	60min	24h	training	0.566667
week1_test 2b_15min	15min	48h	testing	3.51667
week1_test 2b_15min	15min	48h	training	0.416667
week1_test 2b_30min	30min	48h	testing	2.4
week1_test 2b_30min	30min	48h	training	1.68333
week1_test 2b_60min	60min	48h	testing	2.01667
week1_test 2b_60min	60min	48h	training	1.68333
week1_test 3a_30min	30min	24h	testing	1.98333
week1_test 3a_30min	30min	24h	training	0.883333
week1_test 3a_60min	60min	24h	testing	1.71667
week1_test 3a_60min	60min	24h	training	0.883333
week1_test 3b_15min	15min	48h	testing	1.9
week1_test 3b_15min	15min	48h	training	0.633333
week1_test 3b_30min	30min	48h	testing	1.28333
week1_test 3b_30min	30min	48h	training	0.983333
week1_test 3b_60min	60min	48h	testing	3.51667
week1_test 3b_60min	60min	48h	training	0.983333
week1_test 4a_60min	60min	24h	testing	1.96667
week1_test 4a_60min	60min	24h	training	1.21667
week1_test 4b_15min	15min	48h	testing	2.7
week1_test 4b_15min	15min	48h	training	0.3
week1_test 4b_30min	30min	48h	testing	2.83333
week1_test 4b_30min	30min	48h	training	1.16667
week1_test 4b_60min	60min	48h	testing	2.45
week1_test 4b_60min	60min	48h	training	0.9
week1_test 5a_60min	60min	24h	testing	2.61667
week1_test 5a_60min	60min	24h	training	1.53333
week1_test 5b_15min	15min	48h	testing	3.7
week1_test 5b_15min	15min	48h	training	0.716667
week1_test 5b_30min	30min	48h	testing	2.98333
week1_test 5b_30min	30min	48h	training	0.916667
week1_test 5b_60min	60min	48h	testing	2.56667
week1_test 5b_60min	60min	48h	training	1.25
week2_test 1a_15min	15min	24h	testing	2.25
week2_test 1a_15min	15min	24h	training	0.283333
week2_test 1a_30min	30min	24h	testing	2.3
week2_test 1a_30min	30min	24h	training	0.816667
week2_test 1a_60min	60min	24h	testing	1.98333
week2_test 1a_60min	60min	24h	training	1
week2_test 1b_15min	15min	48h	testing	2.11667
week2_test 1b_15min	15min	48h	training	0.466667
week2_test 1b_60min	60min	48h	testing	1.58333
week2_test 1b_60min	60min	48h	training	1.38333
week2_test 2a_15min	15min	24h	testing	2.51667
week2_test 2a_15min	15min	24h	training	0.65
week2_test 2a_30min	30min	24h	testing	2.5
week2_test 2a_30min	30min	24h	training	1.35
week2_test 2a_60min	60min	24h	testing	2.35
week2_test 2a_60min	60min	24h	training	0.85
week2_test 2b_60min	60min	48h	testing	2.11667
week2_test 2b_60min	60min	48h	training	1.55
week2_test 3a_15min	15min	24h	testing	1.05
week2_test 3a_15min	15min	24h	training	0.683333
week2_test 3a_30min	30min	24h	testing	1.4
week2_test 3a_30min	30min	24h	training	1.06667
week2_test 3a_60min	60min	24h	testing	1.56667
week2_test 3a_60min	60min	24h	training	0.833333
week2_test 3b_15min	15min	48h	testing	2.68333
week2_test 3b_15min	15min	48h	training	0.666667
week2_test 3b_30min	30min	48h	testing	3.01667
week2_test 3b_30min	30min	48h	training	0.966667
week2_test 4a_30min	30min	24h	testing	2.51667
week2_test 4a_30min	30min	24h	training	0.5
week2_test 4a_60min	60min	24h	testing	2.3
week2_test 4a_60min	60min	24h	training	1.28333
week2_test 4b_60min	60min	48h	testing	2.81667
week2_test 4b_60min	60min	48h	training	0.7
week2_test 5a_30min	30min	24h	testing	2.06667
week2_test 5a_30min	30min	24h	training	0.95
week2_test 5a_60min	60min	24h	testing	1.45
week2_test 5a_60min	60min	24h	training	0.983333
week3_test 1a_15min	15min	24h	testing	3.33333
week3_test 1a_15min	15min	24h	training	0.666667
week3_test 1a_30min	30min	24h	testing	1.61667
week3_test 1a_30min	30min	24h	training	1
week3_test 1a_60min	60min	24h	testing	2.05
week3_test 1a_60min	60min	24h	training	1.2
week3_test 1b_15min	15min	48h	testing	3.98333
week3_test 1b_15min	15min	48h	training	0.766667
week3_test 1b_30min	30min	48h	testing	2.66667
week3_test 1b_30min	30min	48h	training	0.566667
week3_test 1b_60min	60min	48h	testing	2.46667
week3_test 1b_60min	60min	48h	training	1.01667
week3_test 2a_15min	15min	24h	testing	2.9
week3_test 2a_15min	15min	24h	training	0.566667
week3_test 2a_30min	30min	24h	testing	3.03333
week3_test 2a_30min	30min	24h	training	0.683333
week3_test 2a_60min	60min	24h	testing	0.85
week3_test 2a_60min	60min	24h	training	0.583333
week3_test 2b_30min	30min	48h	testing	3.08333
week3_test 2b_30min	30min	48h	training	1.01667
week3_test 2b_60min	60min	48h	testing	2.35
week3_test 2b_60min	60min	48h	training	0.833333
week3_test 3a_15min	15min	24h	testing	2.2
week3_test 3a_15min	15min	24h	training	0.866667
week3_test 3a_30min	30min	24h	testing	1.4
week3_test 3a_30min	30min	24h	training	0.966667
week3_test 3a_60min	60min	24h	testing	2.4
week3_test 3a_60min	60min	24h	training	1.53333
week3_test 3b_15min	15min	48h	testing	3.85
week3_test 3b_15min	15min	48h	training	0.533333
week3_test 3b_30min	30min	48h	testing	2.53333
week3_test 3b_30min	30min	48h	training	1
week3_test 3b_60min	60min	48h	testing	1.63333
week3_test 3b_60min	60min	48h	training	1.3
week3_test 4a_15min	15min	24h	testing	1.75
week3_test 4a_15min	15min	24h	training	0.883333
week3_test 4a_30min	30min	24h	testing	2.61667
week3_test 4a_30min	30min	24h	training	0.883333
week3_test 4a_60min	60min	24h	testing	2.2
week3_test 4a_60min	60min	24h	training	1.03333
week3_test 4b_15min	15min	48h	testing	3.05
week3_test 4b_15min	15min	48h	training	0.8
week3_test 4b_30min	30min	48h	testing	1.75
week3_test 4b_30min	30min	48h	training	0.95
week3_test 4b_60min	60min	48h	testing	3.03333
week3_test 4b_60min	60min	48h	training	1.25
week3_test 5a_15min	15min	24h	testing	3.01667
week3_test 5a_15min	15min	24h	training	0.983333
week3_test 5a_30min	30min	24h	testing	2.31667
week3_test 5a_30min	30min	24h	training	1.18333
week3_test 5b_30min	30min	48h	testing	2.61667
week3_test 5b_30min	30min	48h	training	1.11667
week3_test 5b_60min	60min	48h	testing	2.68333
week3_test 5b_60min	60min	48h	training	0.966667
week4_test 1a_15min	15min	24h	testing	1.53333
week4_test 1a_15min	15min	24h	training	0.3
week4_test 1a_30min	30min	24h	testing	2.05
week4_test 1a_30min	30min	24h	training	1
week4_test 1a_60min	60min	24h	testing	0.85
week4_test 1a_60min	60min	24h	training	0.9
week4_test 1b_15min	15min	48h	testing	2.93333
week4_test 1b_15min	15min	48h	training	0.583333
week4_test 1b_30min	30min	48h	testing	2.43333
week4_test 1b_30min	30min	48h	training	0.716667
week4_test 1b_60min	60min	48h	testing	2.45
week4_test 1b_60min	60min	48h	training	1.01667
week4_test 2a_15min	15min	24h	testing	1.65
week4_test 2a_15min	15min	24h	training	0.883333
week4_test 2a_30min	30min	24h	testing	1.38333
week4_test 2a_30min	30min	24h	training	0.533333
week4_test 2a_60min	60min	24h	testing	2.46667
week4_test 2a_60min	60min	24h	training	1.35
week4_test 2b_15min	15min	48h	testing	3
week4_test 2b_15min	15min	48h	training	0.683333
week4_test 2b_30min	30min	48h	testing	1.75
week4_test 2b_30min	30min	48h	training	0.883333
week4_test 2b_60min	60min	48h	testing	1.38333
week4_test 2b_60min	60min	48h	training	1.2
week4_test 3a_15min	15min	24h	testing	2.36667
week4_test 3a_15min	15min	24h	training	0.533333
week4_test 3a_60min	60min	24h	testing	2.71667
week4_test 3a_60min	60min	24h	training	0.716667
week4_test 3b_15min	15min	48h	testing	3.71667
week4_test 3b_15min	15min	48h	training	0.316667
week4_test 3b_30min	30min	48h	testing	2.85
week4_test 3b_30min	30min	48h	training	0.3
week4_test 3b_60min	60min	48h	testing	1.7
week4_test 3b_60min	60min	48h	training	1.25
week4_test 4a_15min	15min	24h	testing	2.26667
week4_test 4a_15min	15min	24h	training	0.366667
week4_test 4a_30min	30min	24h	testing	1.46667
week4_test 4a_30min	30min	24h	training	1.03333
week4_test 4a_60min	60min	24h	testing	2.05
week4_test 4a_60min	60min	24h	training	1.71667
week4_test 4b_15min	15min	48h	testing	3.3
week4_test 4b_15min	15min	48h	training	0.75
week4_test 4b_30min	30min	48h	testing	2.1
week4_test 4b_30min	30min	48h	training	0.983333
week4_test 4b_60min	60min	48h	testing	2.9
week4_test 4b_60min	60min	48h	training	1.43333
week4_test 5a_60min	60min	24h	testing	1.48333
week4_test 5a_60min	60min	24h	training	1.03333
week4_test 5b_30min	30min	48h	testing	2.56667
week4_test 5b_30min	30min	48h	training	1.06667
week4_test 5b_60min	60min	48h	testing	2.51667
week4_test 5b_60min	60min	48h	training	1.06667

## Sheet: Cold anesthesia
treatment	experience	interval	res_time
anesthetized	trained	0.966667	1.48467
anesthetized	trained	4.68333	3.254
anesthetized	trained	4.83333	2.61067
anesthetized	trained	3.01667	2.00733
anesthetized	trained	0.616667	0.986667
anesthetized	trained	0.766667	1.686
anesthetized	trained	4.23333	3.628
anesthetized	trained	0.3	0.878
anesthetized	trained	4.26667	1.368
anesthetized	trained	2.53333	1.80733
anesthetized	trained	1.43333	2.386
anesthetized	trained	1.75	6.35067
anesthetized	trained	0.4	2.044
anesthetized	trained	0.55	2.24933
anesthetized	trained	0.733333	2.20867
anesthetized	trained	2.83333	3.28667
anesthetized	trained	3.56667	4.11933
anesthetized	trained	0.55	1.85067
anesthetized	trained	3.05	1.32333
anesthetized	trained	2.85	2.09533
anesthetized	trained	1.68333	3.07
anesthetized	trained	2.83333	2.828
anesthetized	trained	0.283333	1.44533
anesthetized	trained	0.416667	1.65333
anesthetized	trained	2.85	1.41467
anesthetized	trained	3.55	1.35067
anesthetized	trained	0.466667	1.04267
anesthetized	trained	2.85	1.33333
anesthetized	trained	2.95	1.478
anesthetized	trained	0.816667	1.19267
anesthetized	trained	0.35	1.75067
anesthetized	trained	2.15	2.34733
anesthetized	untrained	0.983333	1.866
anesthetized	untrained	4.75	2.954
anesthetized	untrained	4.9	4.16933
anesthetized	untrained	3.05	2.03533
anesthetized	untrained	0.283333	1.456
anesthetized	untrained	0.633333	8.39933
anesthetized	untrained	3.71667	3.978
anesthetized	untrained	0.783333	3.00333
anesthetized	untrained	4.3	6.42867
anesthetized	untrained	0.3	2.50333
anesthetized	untrained	4.26667	6.442
anesthetized	untrained	2.56667	9.478
anesthetized	untrained	1.48333	6.87867
anesthetized	untrained	1.86667	1.278
anesthetized	untrained	0.45	3.56067
anesthetized	untrained	0.583333	2.036
anesthetized	untrained	0.783333	6.20333
anesthetized	untrained	2.88333	7.01933
anesthetized	untrained	3.63333	1.51667
anesthetized	untrained	0.583333	3.35267
anesthetized	untrained	3.06667	5.344
anesthetized	untrained	2.86667	5.73533
anesthetized	untrained	1.73333	6.01933
anesthetized	untrained	2.86667	2.702
anesthetized	untrained	0.316667	2.30133
anesthetized	untrained	0.416667	5.01333
anesthetized	untrained	2.85	2.47533
anesthetized	untrained	3.56667	2.814
anesthetized	untrained	0.533333	2.14533
anesthetized	untrained	0.483333	1.62467
anesthetized	untrained	2.86667	2.36467
anesthetized	untrained	3.03333	1.89933
anesthetized	untrained	0.816667	3.366
anesthetized	untrained	0.35	1.41733
anesthetized	untrained	2.18333	3.31133
control	trained	0.916667	1.128
control	trained	4.8	2.26933
control	trained	4.95	3.36533
control	trained	3.05	1.78667
control	trained	0.3	2.22467
control	trained	0.733333	2.19
control	trained	3.58333	2.27733
control	trained	0.816667	3.666
control	trained	4.36667	1.47467
control	trained	0.25	1.958
control	trained	4.35	3.98133
control	trained	2.66667	3.304
control	trained	1.41667	0.478
control	trained	1.83333	1.74867
control	trained	0.4	2.82733
control	trained	0.55	1.056
control	trained	0.8	1.858
control	trained	2.98333	3.22467
control	trained	3.58333	3.13267
control	trained	0.583333	1.51733
control	trained	3.13333	1.82467
control	trained	2.91667	1.202
control	trained	1.78333	4.03667
control	trained	2.81667	1.49533
control	trained	0.333333	1.37667
control	trained	0.6	3.00867
control	trained	2.81667	0.894667
control	trained	3.58333	1.32867
control	trained	2.13333	2.99
control	trained	0.516667	0.216667
control	trained	0.466667	1.98733
control	trained	2.85	1.542
control	trained	3	1.98467
control	trained	0.833333	2.58667
control	trained	2.2	0.923333
control	untrained	0.95	5.59533
control	untrained	4.78333	5.19533
control	untrained	5.01667	5.234
control	untrained	3.11667	4.46133
control	untrained	0.333333	5.49467
control	untrained	0.783333	7.21533
control	untrained	3.63333	4.91133
control	untrained	0.866667	2.97667
control	untrained	4.4	5.57867
control	untrained	0.3	4.82533
control	untrained	4.43333	5.552
control	untrained	2.71667	5.81933
control	untrained	1.41667	7.34133
control	untrained	1.86667	7.152
control	untrained	0.433333	5.54533
control	untrained	0.583333	5.30267
control	untrained	0.833333	4.64867
control	untrained	3.03333	3.55733
control	untrained	3.65	5.39467
control	untrained	0.6	2.92533
control	untrained	3.18333	1.62
control	untrained	2.95	5.9
control	untrained	1.85	4.08533
control	untrained	2.85	6.48733
control	untrained	0.35	5.554
control	untrained	0.633333	4.144
control	untrained	2.85	1.67
control	untrained	3.61667	3.79867
control	untrained	2.18333	2.336
control	untrained	0.566667	3.18667
control	untrained	0.5	1.12267
control	untrained	2.88333	1.88667
control	untrained	3.03333	1.768
control	untrained	0.883333	2.18733
control	untrained	2.21667	3.924

## Sheet: Ethacrynic acid
treatment	experience	interval	res_time
control	trained	1.66667	1.61667
control	trained	1.58333	2.68333
control	trained	1.46667	1.15
control	trained	1.45	1.48333
control	trained	1.66667	1.51667
control	trained	1.76667	1.45
control	trained	1.5	2.11667
control	trained	1.58333	1.15
control	trained	1.66667	1.61667
control	trained	1.85	2.1
control	trained	1.48333	2.35
control	trained	1.7	2.43333
control	trained	1.66667	1.4
control	trained	1.9	1.75
control	trained	1.6	1.65
control	trained	1.81667	1.16667
control	trained	1.66667	1.91667
control	trained	1.95	1.8
control	trained	1.68333	1.41667
control	trained	1.9	1.48333
control	trained	1.66667	1.8
control	trained	2.01667	1.45
control	trained	1.85	2.2
control	trained	1.95	2.41667
control	trained	2.08333	1.76667
control	trained	1.91667	2.08333
control	untrained	1.66667	5.05
control	untrained	1.58333	5.45
control	untrained	1.46667	5.5
control	untrained	1.45	6.23333
control	untrained	1.66667	4.46667
control	untrained	1.76667	5.06667
control	untrained	1.5	4.3
control	untrained	1.58333	6.46667
control	untrained	1.66667	2.96667
control	untrained	1.85	4.38333
control	untrained	1.48333	4.58333
control	untrained	1.7	3.68333
control	untrained	1.66667	5.28333
control	untrained	1.9	5.4
control	untrained	1.6	4.83333
control	untrained	1.81667	2.76667
control	untrained	1.66667	3.8
control	untrained	1.95	3.16667
control	untrained	1.68333	5.81667
control	untrained	1.9	5.63333
control	untrained	1.66667	3.76667
control	untrained	2.01667	4.53333
control	untrained	1.85	4.25
control	untrained	1.95	6.68333
control	untrained	2.08333	6.2
control	untrained	1.91667	6.01667
ethacid	trained	1.48333	1.01667
ethacid	trained	1.48333	3.5
ethacid	trained	1.41667	0.816667
ethacid	trained	1.41667	1.4
ethacid	trained	1.66667	2.16667
ethacid	trained	1.65	3.15
ethacid	trained	1.51667	1.55
ethacid	trained	1.51667	2.38333
ethacid	trained	1.66667	1.68333
ethacid	trained	1.81667	0.933333
ethacid	trained	1.5	2.95
ethacid	trained	1.66667	2.01667
ethacid	trained	1.66667	1.33333
ethacid	trained	1.88333	2.25
ethacid	trained	1.53333	1.55
ethacid	trained	1.76667	1.28333
ethacid	trained	1.66667	0.783333
ethacid	trained	1.93333	2.26667
ethacid	trained	1.6	2.96667
ethacid	trained	1.83333	2.23333
ethacid	trained	1.66667	1.7
ethacid	trained	1.98333	1.28333
ethacid	trained	1.75	1.35
ethacid	trained	1.93333	2.61667
ethacid	trained	2.05	2.01667
ethacid	trained	1.9	1.13333
ethacid	untrained	1.48333	5.2
ethacid	untrained	1.48333	5.46667
ethacid	untrained	1.41667	5.3
ethacid	untrained	1.41667	3.66667
ethacid	untrained	1.66667	4.05
ethacid	untrained	1.65	6.71667
ethacid	untrained	1.51667	2.31667
ethacid	untrained	1.51667	6.11667
ethacid	untrained	1.66667	3.66667
ethacid	untrained	1.81667	4.51667
ethacid	untrained	1.5	5.18333
ethacid	untrained	1.66667	4.48333
ethacid	untrained	1.66667	4.7
ethacid	untrained	1.88333	5.13333
ethacid	untrained	1.53333	4.78333
ethacid	untrained	1.76667	5.43333
ethacid	untrained	1.66667	3.01667
ethacid	untrained	1.93333	6.11667
ethacid	untrained	1.6	6.21667
ethacid	untrained	1.83333	5.43333
ethacid	untrained	1.66667	4.3
ethacid	untrained	1.98333	4.6
ethacid	untrained	1.75	5.65
ethacid	untrained	1.93333	4.11667
ethacid	untrained	2.05	5.31667
ethacid	untrained	1.9	3.7

## Sheet: Anisomycin
treatment	experience	interval	res_time
anisomycin	trained	2.05	0.389333
anisomycin	trained	2.03	2.99133
anisomycin	trained	2.32	1.848
anisomycin	trained	2.42	2.112
anisomycin	trained	2.52	1.71667
anisomycin	trained	2.58	1.37667
anisomycin	trained	2.63	2.19333
anisomycin	trained	2.68	2.182
anisomycin	trained	2.83	4.82
anisomycin	trained	3.07	2.45333
anisomycin	trained	3.48	3.18533
anisomycin	trained	3.25	1.26133
anisomycin	trained	3.4	2.04133
anisomycin	trained	2.18	2.762
anisomycin	trained	2.42	2.28667
anisomycin	trained	2.28	1.35067
anisomycin	trained	2.42	1.27867
anisomycin	trained	2.47	2.16667
anisomycin	trained	2.47	2.20267
anisomycin	trained	2.23	2.03333
anisomycin	trained	2.25	0.738667
anisomycin	trained	2.42	2.35267
anisomycin	trained	2.58	2.80867
anisomycin	trained	2.78	3.50933
anisomycin	trained	2.97	1.55733
anisomycin	trained	2.33	2.96133
anisomycin	untrained	2.1	2.108
anisomycin	untrained	2.17	7.278
anisomycin	untrained	2.35	4.00867
anisomycin	untrained	2.47	2.828
anisomycin	untrained	2.55	2.92
anisomycin	untrained	2.58	4.69333
anisomycin	untrained	2.68	3.23467
anisomycin	untrained	2.73	2.57267
anisomycin	untrained	2.87	5.57667
anisomycin	untrained	3.12	3.34267
anisomycin	untrained	3.22	2.10333
anisomycin	untrained	3.28	4.15
anisomycin	untrained	3.37	5.058
anisomycin	untrained	2.23	4.36
anisomycin	untrained	2.47	3.142
anisomycin	untrained	2.32	3.88867
anisomycin	untrained	2.43	2.46667
anisomycin	untrained	2.52	4.19867
anisomycin	untrained	2.53	6.41933
anisomycin	untrained	1.23	2.14533
anisomycin	untrained	1.35	2.778
anisomycin	untrained	2.28	4.84533
anisomycin	untrained	2.28	6.72533
anisomycin	untrained	2.47	7.54333
anisomycin	untrained	2.63	4.17333
anisomycin	untrained	2.72	2.69267
anisomycin	untrained	2.85	4.458
control	trained	2.13	0.526
control	trained	2.4	2.036
control	trained	2.47	3.68533
control	trained	2.62	1.41133
control	trained	2.7	1.67
control	trained	3	2.20733
control	trained	3.13	2.83467
control	trained	3.17	1.20867
control	trained	3.3	1.69467
control	trained	3.47	2.61933
control	trained	2.27	0.216667
control	trained	2.38	0.460667
control	trained	2.32	2.00333
control	trained	2.47	0.532
control	trained	2.52	0.212
control	trained	2.35	1.23267
control	trained	2.43	1.752
control	trained	2.65	2.05067
control	trained	3.62	0.794
control	trained	2.67	2.20067
control	trained	2.05	3.15333
control	trained	1.9	2.26067
control	trained	1.8	3.26133
control	untrained	2.15	2.86
control	untrained	2.37	0.984
control	untrained	2.45	1.7
control	untrained	2.53	2.262
control	untrained	2.57	2.02067
control	untrained	2.65	2.47667
control	untrained	2.75	2.768
control	untrained	2.8	5.84533
control	untrained	3.05	1.608
control	untrained	3.17	1.684
control	untrained	3.18	3.30867
control	untrained	3.35	4.84333
control	untrained	3.57	2.24
control	untrained	2.32	5.126
control	untrained	2.42	3.46867
control	untrained	2.38	4.702
control	untrained	2.48	4.64467
control	untrained	2.55	2.00933
control	untrained	2.58	1.91667
control	untrained	1.32	1.752
control	untrained	1.35	2.994
control	untrained	2.3	5.03867
control	untrained	2.37	3.286
control	untrained	2.58	4.81467
control	untrained	2.68	5.46733
